# Supplementary material
Source: PubMed Central journal article supplement (PMC4249288)
Supplement: IAI.02236-14_zii999090961so1.pdf [file IAI.02236-14_zii999090961so1.pdf]

**Supplemental Table 1. Oligonucleotides used in this study**

| <b>Primer</b>                | <b>Sequence</b>              | <b>Use<sup>a</sup></b> |
|------------------------------|------------------------------|------------------------|
| <b>KII1-S</b>                | TCCCCCAGTTGCAGCACTAT         | 1                      |
| <b>Klr1-As</b>               | TCGCGGTAGTCAACAATACCA        | 1                      |
| <b>M13F-S</b>                | CAGGAAACAGCTATGAC            | 1,2                    |
| <b>M13R-As</b>               | GTAAAACGACGGCCAG             | 1,2                    |
| <b>9V-S</b>                  | GATATTGAAGGCTATGCGGAGCTG     | 2                      |
| <b>9V-As</b>                 | CCTCAAGGAAAGAAGTATCAGG       | 2                      |
| <b><i>tprK</i>internal-S</b> | TGGCGTGCAGGAATACATTA         | 2                      |
| <b>V1-S</b>                  | GTGGGCTCAGGTTTCGTTT          | 3                      |
| <b>V1-As</b>                 | GTTTCTTCGCATAGACATTCCCCTCAC  | 3                      |
| <b>V2-S</b>                  | GGGGCTCACGTTTGATATTG         | 3                      |
| <b>V2-As</b>                 | GTTTCTTCCGGTGAGCTCCACTTTAAT  | 3                      |
| <b>V3-S</b>                  | GAGCGTACGCGTGAAGATG          | 3                      |
| <b>V3-As</b>                 | GTTTCTTTAGCAGCCAGAGCACACAGA  | 3                      |
| <b>V4-S</b>                  | CTTTGGGGTCTGTGTGCTCT         | 3                      |
| <b>V4-As</b>                 | GTTTCTTAACGATACCCCAACGTCAAC  | 3                      |
| <b>V5-S</b>                  | TTGGGGTATCGTTGGTTCTC         | 3                      |
| <b>V5-As</b>                 | GTTTCTTCCCAAATCAAGACCCTCAAG  | 3                      |
| <b>V6-S</b>                  | AAACCAAGGGGTCTGATCCT         | 3                      |
| <b>V6-As</b>                 | GTTTCTTTAGACGATACGAACCCCAAGA | 2,3                    |
| <b>V7-S</b>                  | TGGGTGAGTATGGTTGGGTTA        | 3                      |
| <b>V7-As</b>                 | GTTTCTTGCCGAATCTCCACCTTCTCT  | 3                      |
| <b>qV1-S</b>                 | CCCGGATATTGAAGGCTATGC        | 4                      |
| <b>qV1-As</b>                | CACAATGGGGAACACAATCTTAA      | 4                      |
| <b>qV2-S</b>                 | TTTGCGTCTAACACCGACTG         | 4                      |
| <b>qV2-As</b>                | CCCCCAATCCATACTTGCT          | 4                      |
| <b>qV3-S</b>                 | AACTCCACACTGTCTAGCGGCTAT     | 4                      |
| <b>qV3-As</b>                | CCCCGACATCCATAAGATG          | 4                      |
| <b>qV4-S</b>                 | TGTGTGCTCTGGCTGCTACAG        | 4                      |
| <b>qV4-As</b>                | CCAACGTCAACAACGCATCT         | 4                      |
| <b>qV5-S</b>                 | TTCTCGGCGGGAGGATATTT         | 4                      |
| <b>qV5-As</b>                | TCGAGCTTAATATAGGCAGCACAGT    | 4                      |
| <b>qV6-S</b>                 | GGGTGTTGATGTGCGTACGTA        | 4                      |

|                                     |                                |   |
|-------------------------------------|--------------------------------|---|
| <b>qV6-As</b>                       | ACTTTTCCATACACCGGGAAGTAG       | 4 |
| <b>qV7-S</b>                        | AAACTTGTACGGCGGTACGAA          | 4 |
| <b>qV7-As</b>                       | CCCACACTCGTAATACCCACAAT        | 4 |
| <b>V1-V2cons-S</b>                  | ACTTTGCTCCACCATTTGACTC         | 4 |
| <b>V1-V2cons-As</b>                 | TGTTCCCCATTGTGGCAA             | 4 |
| <b>V1 inoc<sup>b</sup></b>          | CATATGAAGATGGTAGCGCCGGAAACC    | 5 |
| <b>V2 inoc<sup>b</sup></b>          | CAAACGGCAACGTCCCAGCAGG         | 5 |
| <b>V2 7909K<sup>b</sup></b>         | CAAAGACAGTCAGGGCAAGGCCCC       | 5 |
| <b>V2 7912D<sup>b</sup></b>         | ACAGTCAGGGCAACGTCCCAGCAG       | 5 |
| <b>V3inoc<sup>b</sup></b>           | CACAGCCCGAGCCGGAGCC            | 5 |
| <b>V3 7903C<sup>b</sup></b>         | CCAAGCAGCCGGAGCCG              | 5 |
| <b>V3 7909W<sup>b</sup></b>         | CCACAGCCCAACCCCCAGCC           | 5 |
| <b>V4inoc<sup>b</sup></b>           | AATGCAGCGAACGTCAATGGCACC       | 5 |
| <b>V4 7912c<sup>b</sup></b>         | AAACGGAGCGAACGTCAATGGCAC       | 5 |
| <b>V5inoc<sup>b</sup></b>           | TTTCTCACCCACCCATGCAGAAGGAC     | 5 |
| <b>V5 7909Jminor<sup>b</sup></b>    | TATTTTCGCATCGAAGGCCAGCAATG     | 5 |
| <b>V5 7909L<sup>b</sup></b>         | TTTCTCACCGATACCACACCCATGCA     | 5 |
| <b>V6 inocmajor<sup>b</sup></b>     | AGCCGCAGTGCCAGCCGC             | 5 |
| <b>V6 7912 C/D<sup>b</sup></b>      | ATGCCCGTCTATTACTTCACCCAAGCCC   | 5 |
| <b>V7 inoc<sup>b</sup></b>          | AAGCTGCTGCTGCAGTTCCTGCTACG     | 5 |
| <b>V7 7909K<sup>b</sup></b>         | AGAAAAACGATGCTCCTGCTACGAAGTGGA | 5 |
| <b>V7 7909N<sup>b</sup></b>         | AAAAAGGCCACGCCCCCTGCT          | 5 |
| <b><i>tprKV1-V2<sup>b</sup></i></b> | ACCGCGGTGAGGGGAATGTCTATG       | 5 |

<sup>a</sup> 1, PCR Amplification; 2, Sequencing; 3, Fragment Length Analysis; 4, Quantitative

Real Time PCR; 5, Probe

<sup>b</sup> Labeled with 5' FAM and 3' TAMRA

**Supplemental Table 2. GenBank Accession numbers**

| <b>Rabbit</b> | <b>Sample</b>   | <b>PCR</b> | <b>Clones</b>                                                                                |
|---------------|-----------------|------------|----------------------------------------------------------------------------------------------|
| <b>7888</b>   | <b>Inoculum</b> | KM015619   | KM015633 KM015634 KM015635 KM015636 KM015637<br>KM015638 KM015639 KM015640 KM015641 KM015642 |
| <b>7898</b>   | <b>C</b>        | KM015620   | KM015643 KM015644 KM015645 KM015646 KM015647<br>KM015648 KM015649 KM015650 KM015651 KM015652 |
|               | <b>D</b>        | *          | KM015653 KM015654 KM015655 KM015656 KM015657<br>KM015658 KM015659 KM015660 KM015661 KM015662 |
|               | <b>E</b>        | KM015621   | KM015663 KM015664 KM015665 KM015666 KM015667<br>KM015668 KM015669 KM015670 KM015671 KM015672 |
| <b>7901</b>   | <b>A</b>        | *          | KM015703 KM015704 KM015705 KM015706 KM015707<br>KM015708 KM015709 KM015710 KM015711 KM015712 |
|               | <b>C</b>        | KM015622   | KM015713 KM015714 KM015715 KM015716 KM015717<br>KM015718 KM015719 KM015720 KM015721 KM015722 |
|               | <b>D</b>        | KM015623   | KM015723 KM015724 KM015725 KM015726 KM015727<br>KM015728 KM015729 KM015730 KM015731 KM015732 |
|               | <b>E</b>        | KM015624   | KM015733 KM015734 KM015735 KM015736 KM015737<br>KM015738 KM015739 KM015740 KM015741 KM015742 |
| <b>7902</b>   | <b>A</b>        | KM015625   | KM015673 KM015674 KM015675 KM015676 KM015677<br>KM015678 KM015679 KM015680 KM015681 KM015682 |
|               | <b>B</b>        | KM015626   | KM015683 KM015684 KM015685 KM015686 KM015687<br>KM015688 KM015689 KM015690 KM015691 KM015692 |
|               | <b>C</b>        | KM015627   | KM015693 KM015694 KM015695 KM015696 KM015697<br>KM015698 KM015699 KM015700 KM015701 KM015702 |
| <b>7903</b>   | <b>A</b>        | KM015628   | KM015743 KM015744 KM015745 KM015746 KM015747<br>KM015748 KM015749 KM015750 KM015751 KM015752 |
|               | <b>B</b>        | KM015629   | KM015753 KM015754 KM015755 KM015756 KM015757<br>KM015758 KM015759 KM015760 KM015761 KM015762 |
|               | <b>C</b>        | KM015630   | KM015763 KM015764 KM015765 KM015766 KM015767<br>KM015768 KM015769 KM015770 KM015771 KM015772 |
| <b>7909</b>   | <b>B</b>        | KM015592   | KM015844 KM015845 KM015846 KM015847 KM015848<br>KM015849 KM015850 KM015851 KM015852 KM015853 |
|               | <b>C</b>        | KM015593   | KM015854 KM015855 KM015856 KM015857 KM015858<br>KM015859 KM015860 KM015861 KM015862 KM015863 |
|               | <b>D</b>        | KM015594   | KM015864 KM015865 KM015866 KM015867 KM015868<br>KM015869 KM015870 KM015871 KM015872 KM015873 |
|               | <b>E</b>        | KM015595   | KM015874 KM015875 KM015876 KM015877 KM015878<br>KM015879 KM015880 KM015881 KM015882 KM015883 |
|               | <b>F</b>        | KM015596   | KM015884 KM015885 KM015886 KM015887 KM015888<br>KM015889 KM015890 KM015891 KM015892 KM015893 |

|             |          |          |                                                                                              |
|-------------|----------|----------|----------------------------------------------------------------------------------------------|
|             | <b>G</b> | KM015597 | KM015894 KM015895 KM015896 KM015897 KM015898<br>KM015899 KM015900 KM015901 KM015902 KM015903 |
|             | <b>H</b> | KM015598 | KM015904 KM015905 KM015906 KM015907 KM015908<br>KM015909 KM015910 KM015911 KM015912 KM015913 |
|             | <b>I</b> | KM015599 | KM015914 KM015915 KM015916 KM015917 KM015918<br>KM015919 KM015920 KM015921 KM015922 KM015923 |
|             | <b>J</b> | KM015600 | KM015924 KM015925 KM015926 KM015927 KM015928<br>KM015929 KM015930 KM015931 KM015932 KM015933 |
|             | <b>K</b> | KM015601 | KM015934 KM015935 KM015936 KM015937 KM015938<br>KM015939 KM015940 KM015941 KM015942 KM015943 |
|             | <b>L</b> | KM015602 | KM015944 KM015945 KM015946 KM015947 KM015948<br>KM015949 KM015950 KM015951 KM015952 KM015953 |
|             | <b>M</b> | KM015603 | KM015954 KM015955 KM015956 KM015957 KM015958<br>KM015959 KM015960 KM015961 KM015962 KM015963 |
|             | <b>N</b> | KM015604 | KM015964 KM015965 KM015966 KM015967 KM015968<br>KM015969 KM015970 KM015971 KM015972 KM015973 |
|             | <b>O</b> | KM015605 | KM015833 KM015974 KM015975 KM015976 KM015977<br>KM015978 KM015979 KM015980 KM015981 KM015982 |
|             | <b>P</b> | KM015606 | KM015983 KM015984 KM015985 KM015986 KM015987<br>KM015988 KM015989 KM015990 KM015991 KM015992 |
|             | <b>Q</b> | KM015607 | KM015834 KM015835 KM015836 KM015837 KM015838<br>KM015839 KM015840 KM015841 KM015842 KM015843 |
|             | <b>R</b> | KM015608 | KM015993 KM015994 KM015995 KM015996 KM015997<br>KM015998 KM015999 KM016000 KM016001 KM016002 |
|             | <b>S</b> | KM015609 | KM016003 KM016004 KM016005 KM016006 KM016007<br>KM016008 KM016009 KM016010 KM016011 KM016012 |
|             | <b>T</b> | KM015610 | KM016013 KM016014 KM016015 KM016016 KM016017<br>KM016018 KM016019 KM016020 KM016021 KM016022 |
|             | <b>U</b> | KM015611 | KM016023 KM016024 KM016025 KM016026 KM016027<br>KM016028 KM016029 KM016030 KM016031 KM016032 |
|             | <b>V</b> | KM015612 | KM016063 KM016064 KM016065 KM016066 KM016067<br>KM016068 KM016069 KM016070 KM016071 KM016072 |
|             | <b>W</b> | KM015613 | KM016033 KM016034 KM016035 KM016036 KM016037<br>KM016038 KM016039 KM016040 KM016041 KM016042 |
|             | <b>X</b> | KM015614 | KM016043 KM016044 KM016045 KM016046 KM016047<br>KM016048 KM016049 KM016050 KM016051 KM016052 |
|             | <b>Y</b> | KM015615 | KM016053 KM016054 KM016055 KM016056 KM016057<br>KM016058 KM016059 KM016060 KM016061 KM016062 |
| <b>7912</b> | <b>A</b> | KM015616 | KM015803 KM015804 KM015805 KM015806 KM015807<br>KM015808 KM015809 KM015810 KM015811 KM015812 |

|             |                 |          |                                                                                              |
|-------------|-----------------|----------|----------------------------------------------------------------------------------------------|
|             | <b>B</b>        | KM015617 | KM015793 KM015794 KM015795 KM015796 KM015797<br>KM015798 KM015799 KM015800 KM015801 KM015802 |
|             | <b>C</b>        | *        | KM015813 KM015814 KM015815 KM015816 KM015817<br>KM015818 KM015819 KM015820 KM015821 KM015822 |
|             | <b>D</b>        | KM015618 | KM015823 KM015824 KM015825 KM015826 KM015827<br>KM015828 KM015829 KM015830 KM015831 KM015832 |
| <b>7919</b> | <b>A</b>        | KM015631 | KM015773 KM015774 KM015775 KM015776 KM015777<br>KM015778 KM015779 KM015780 KM015781 KM015782 |
| <b>7934</b> | <b>A</b>        | KM015632 | KM015783 KM015784 KM015785 KM015786 KM015787<br>KM015788 KM015789 KM015790 KM015791 KM015792 |
| <b>8692</b> | <b>Inoculum</b> | nd       | KM015572 KM015573 KM015574 KM015575 KM015576<br>KM015577 KM015578 KM015579 KM015580 KM015581 |
| <b>8693</b> | <b>Inoculum</b> | nd       | KM015582 KM015583 KM015584 KM015585 KM015586<br>KM015587 KM015588 KM015589 KM015590 KM015591 |
| <b>8694</b> | <b>A</b>        | KM015562 |                                                                                              |
|             | <b>B</b>        | KM015563 |                                                                                              |
|             | <b>C</b>        | KM015564 |                                                                                              |
|             | <b>D</b>        | KM015565 |                                                                                              |
|             | <b>E</b>        | KM015566 |                                                                                              |
|             | <b>F</b>        | KM015567 |                                                                                              |
|             | <b>G</b>        | KM015568 |                                                                                              |
|             | <b>H</b>        | KM015569 |                                                                                              |
|             | <b>I</b>        | KM015570 |                                                                                              |
|             | <b>J</b>        | KM015571 |                                                                                              |
| <b>8696</b> | <b>B</b>        | KM015552 |                                                                                              |
|             | <b>C</b>        | KM015553 |                                                                                              |
|             | <b>D</b>        | KM015554 |                                                                                              |
|             | <b>E</b>        | KM015555 |                                                                                              |
|             | <b>F</b>        | KM015556 |                                                                                              |
|             | <b>I</b>        | KM015557 |                                                                                              |
|             | <b>J</b>        | KM015558 |                                                                                              |
|             | <b>K</b>        | KM015559 |                                                                                              |
|             | <b>L</b>        | KM015560 |                                                                                              |
|             | <b>M</b>        | KM015561 |                                                                                              |
| <b>8697</b> | <b>A</b>        | KM015542 |                                                                                              |
|             | <b>B</b>        | KM015543 |                                                                                              |
|             | <b>C</b>        | KM015544 |                                                                                              |
|             | <b>D</b>        | KM015545 |                                                                                              |
|             | <b>E</b>        | KM015546 |                                                                                              |
|             | <b>F</b>        | KM015547 |                                                                                              |
|             | <b>G</b>        | KM015548 |                                                                                              |
|             | <b>H</b>        | KM015549 |                                                                                              |
|             | <b>I</b>        | KM015550 |                                                                                              |

|             |          |          |  |
|-------------|----------|----------|--|
|             | <b>J</b> | KM015551 |  |
| <b>8699</b> | <b>A</b> | KM015532 |  |
|             | <b>B</b> | KM015533 |  |
|             | <b>C</b> | KM015534 |  |
|             | <b>D</b> | KM015535 |  |
|             | <b>E</b> | KM015536 |  |
|             | <b>F</b> | KM015537 |  |
|             | <b>G</b> | KM015538 |  |
|             | <b>H</b> | KM015539 |  |
|             | <b>J</b> | KM015540 |  |
|             | <b>K</b> | KM015541 |  |
| <b>8700</b> | <b>B</b> | KM015522 |  |
|             | <b>C</b> | KM015523 |  |
|             | <b>D</b> | KM015524 |  |
|             | <b>E</b> | KM015525 |  |
|             | <b>F</b> | KM015526 |  |
|             | <b>G</b> | KM015527 |  |
|             | <b>H</b> | KM015528 |  |
|             | <b>I</b> | KM015529 |  |
|             | <b>J</b> | KM015530 |  |
|             | <b>K</b> | KM015531 |  |

\*PCR did not yield enough amplicon for direct sequencing

Nd=not done

**Supplemental Table 3. Oligopeptides used in this study**

| <b>Peptide</b>    | <b>Sequence</b>                   | <b>Size (aa)</b> |
|-------------------|-----------------------------------|------------------|
| V1 <sup>a</sup>   | GIAYEDGSAGNLKH                    | 14               |
| V2 <sup>a</sup>   | WEGKPNGNVPARVTPSKYGLG             | 21               |
| V3 <sup>a</sup>   | GYATARAGADILWDVGAKVSM             | 21               |
| V4 <sup>a</sup>   | TDVGHKKENAAVNGTVGAD               | 20               |
| V5 <sup>a</sup>   | YFASQASNVFQGVFLTPMQKDDCAAYI       | 28               |
| V5-2 <sup>a</sup> | YFASQASNVFQGVFLTNMLQHDCAYI        | 28               |
| V6 <sup>a</sup>   | MPVHYKVLKARARAGAAVPAADDIYFPV      | 29               |
| V6-2 <sup>a</sup> | PVHYKVLKARALPAAAVPAADDIYFP        | 27               |
| V6-3 <sup>a</sup> | PVHYKVLKAQARARAAPAAADDIYFP        | 27               |
| V7 <sup>a</sup>   | YGGTNKQAAAAPATKWKAHEYCGYY         | 25               |
| V2 <sup>b</sup>   | WEGKDSQGNVPAGVTPSKYGL             | 21               |
| V2-2 <sup>b</sup> | WEGKDSQGKAPAGTPSKYGLG             | 21               |
| V3 <sup>b</sup>   | GYATAQPPANILWDVGAKVSM             | 21               |
| V3-2 <sup>b</sup> | YAQAAGADILWDVGAKVSMKWLWGL         | 24               |
| V4 <sup>b</sup>   | TDVGHKKNGANVNGTVGAD               | 19               |
| V5 <sup>b</sup>   | YFASQASNVFQGVFLTDTPMQKDDCAAYI     | 30               |
| V5-2 <sup>b</sup> | YFASKASNVFQGVFLTPMQKDDCAAYI       | 28               |
| V6 <sup>b</sup>   | PVHWKARARAGAAVPAADDIYFP           | 24               |
| V6-2 <sup>b</sup> | PVHYKVLKARALPGAPVPAIYFP           | 23               |
| V6-3 <sup>b</sup> | PVHYKVLKARARAGAAAGVPALPGAAADD     | 29               |
| V6-4 <sup>b</sup> | PVYYFTQARALPGAPVPAIYFP            | 22               |
| V7 <sup>b</sup>   | YGGTNKKAAAAAPAGTKWKAHEYCGYYE      | 28               |
| V7-2 <sup>b</sup> | YGGTNKQAAAAPATKWSKEYCGYY          | 25               |
| V7-3 <sup>b</sup> | YGGTNKQAAAAPGVVPGAVPATKWKAHEYCGYY | 32               |
| V7-4 <sup>b</sup> | YGGTNKKATPPAAPAAPT KWKAHEYCGYY    | 28               |
| V7-5 <sup>b</sup> | YGGTNKKNDAPATEWKAHEYCGYY          | 23               |

<sup>a</sup> Inoculum Sequence<sup>b</sup> Variant Sequence
